# Supplementary material for: Biomass and Leaf Acclimations to Ultraviolet Solar Radiation in Juvenile Plants of Coffea arabica and C. canephora
Source: MDPI journal article supplement (doi:10.3390/plants10040640), 2021-03-28
Supplement: s1 [file s1]

## Supplementary material

**Table S1.** Biomass allocation (%) in the leaves, stems, and roots for *Coffea arabica* and *C. canephora* grown under near ambient (UVam) and reduced (UVre) UV levels. Estimated mean values  $\pm$  S.E. (n = 8) and ANOVA *P*-values of effects of species and UV levels are shown.

| Species             | UV level | Leaves          | Stems           | Roots           |
|---------------------|----------|-----------------|-----------------|-----------------|
| <i>C. arabica</i>   | UVam     | 42.5 $\pm$ 1.78 | 26.2 $\pm$ 0.90 | 31.3 $\pm$ 2.10 |
|                     | UVre     | 37.7 $\pm$ 1.90 | 29.6 $\pm$ 0.96 | 32.7 $\pm$ 2.25 |
| <i>C. canephora</i> | UVam     | 37.4 $\pm$ 1.78 | 23.3 $\pm$ 0.90 | 39.2 $\pm$ 2.10 |
|                     | UVre     | 36.1 $\pm$ 1.78 | 23.1 $\pm$ 0.90 | 40.8 $\pm$ 2.10 |
| UV level            |          | <u>0.0671</u>   | <b>0.0192</b>   | 0.6276          |
| Species             |          | <b>0.0443</b>   | <b>0.0351</b>   | <b>0.0110</b>   |
| UV level: species   |          | 0.3286          | <u>0.0650</u>   | 0.9787          |

ANOVA *P*-values < 0.05 are marked in bold, whilst marginal values < 0.1 are underlined.

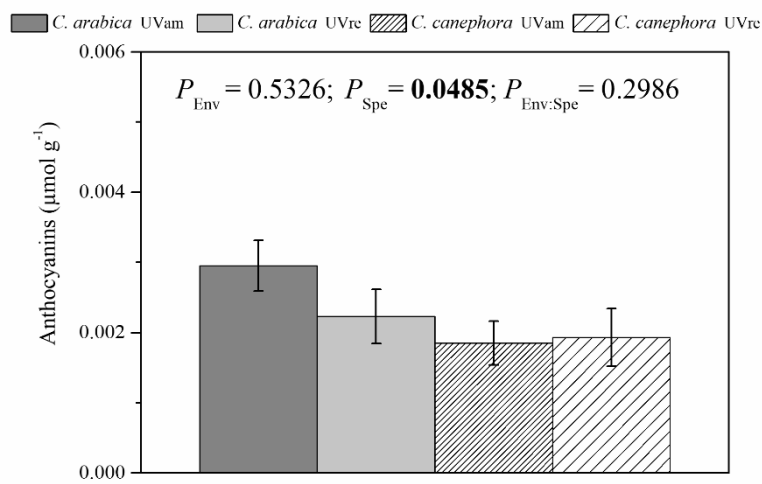

**Figure S1:** Anthocyanin content for *Coffea arabica* and *C. canephora* (Spe) grown under near ambient (UVam) and reduced (UVre) UV levels (Env). Estimated mean values  $\pm$  S.E. (n = 8) and ANOVA *P*-values of effects of species and UV levels are shown. ANOVA *P*-values < 0.05 are marked in bold.
